# Supplementary material for: Selective catalytic reduction of NOx over micro-/meso-/macroporous Cu-SAPO-34
Source: Royal Society of Chemistry journal article supplement (doi:10.1039/d2cy01548j), 2022-01-01
Supplement: d2cy01548j1.pdf [file d2cy01548j1.pdf]

## **Selective Catalytic Reduction of NO<sub>x</sub> over Micro-/Meso-/Macroporous Cu-SAPO-34**

*Magdalena Jabłońska<sup>a,\*</sup>, Kinga Góra-Marek<sup>b</sup>, Muhammad Fernadi Lukman<sup>c</sup>, Karolina Tarach<sup>b</sup>, Marko Bertmer<sup>c</sup>, Reinhard Denecke<sup>d</sup>, David Poppitz<sup>a</sup>, Konstantin Marcinowski<sup>a</sup>, Andreas Pöppel<sup>c</sup>, Roger Gläser<sup>a</sup>*

*a)* Institute of Chemical Technology, Universität Leipzig, Linnéstr. 3, 04103 Leipzig, Germany

*b)* Faculty of Chemistry, Jagiellonian University in Krakow, Gronostajowa 2, 30-387 Krakow, Poland

*c)* Felix Bloch Institute for Solid State Physics, Universität Leipzig, Linnéstr. 5, 04103 Leipzig, Germany

*d)* Wilhelm-Ostwald-Institute for Physical and Theoretical Chemistry, Leipzig University, Linnéstr. 2, D-04103 Leipzig, Germany

\*corresponding author (magdalena.jablonska@uni-leipzig.de)

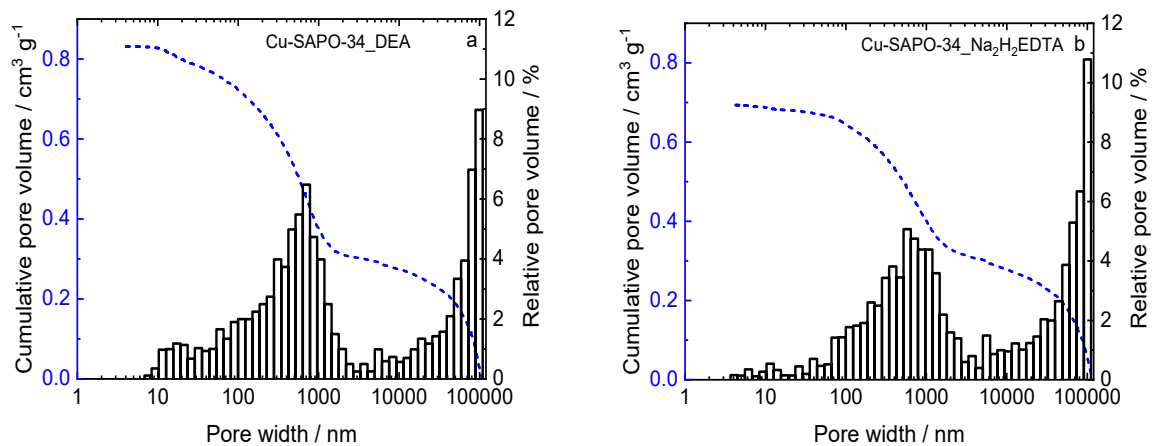

**Fig. S11:** Pore width distribution (solid line) and specific cumulative pore volume (dashed line), determined by Hg porosimetry, of a) Cu-SAPO-34\_DEA and b) Cu-SAPO-34\_Na<sub>2</sub>H<sub>2</sub>EDTA.

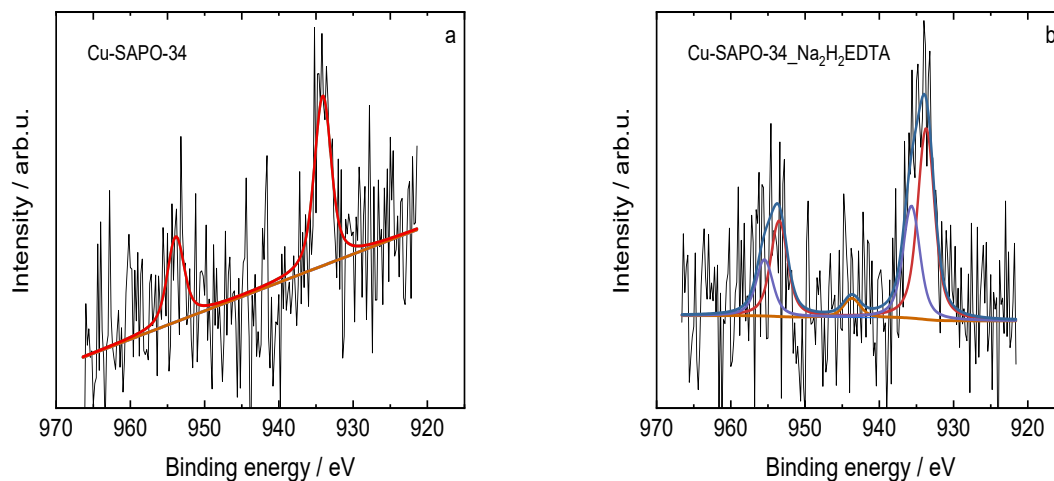

**Fig. S12:** XPS spectra of Cu 2p for a) Cu-SAPO-34 and b) Cu-SAPO-34\_Na<sub>2</sub>H<sub>2</sub>EDTA recorded at room temperature (ca. 25 °C).

**Tab. SI1:** Deconvolution of the  $^{27}\text{Al}$  MAS NMR spectra.

| Sample                                         | Chemical shift ( $\delta_{27\text{Al}}$ ) / ppm (Rel. area / %) |                        |                         |
|------------------------------------------------|-----------------------------------------------------------------|------------------------|-------------------------|
|                                                | $\text{Al}^{\text{IV}}$                                         | $\text{Al}^{\text{V}}$ | $\text{Al}^{\text{VI}}$ |
| SAPO-34                                        | 44.2 (47.1)                                                     | 16.8 (5.1)             | -9.1 (47.8)             |
| Cu-SAPO-34                                     | 44.3 (49.1)                                                     | 16.2 (7.3)             | -9.5 (43.5)             |
| Cu-SAPO-34_ $\text{Na}_2\text{H}_2\text{EDTA}$ | 44.3 (46.8)                                                     | 16.9 (14.0)            | -9.1 (39.2)             |
| Cu-SAPO-34_DEA                                 | 44.4 (48.4)                                                     | 16.7 (12.2)            | -9.3 (39.4)             |

**Tab. SI2:** Deconvolution of the  $^{31}\text{P}$  MAS NMR spectra.

| Sample                                         | Chemical shift ( $\delta_{31\text{P}}$ ) / ppm (Rel. area / %) |             |
|------------------------------------------------|----------------------------------------------------------------|-------------|
|                                                | $\text{P}^{\text{IV}}$                                         |             |
| SAPO-34                                        | 26.4 (38.4)                                                    | 19.2 (61.7) |
| Cu-SAPO-34                                     | 26.3 (36.3)                                                    | 20.1 (63.8) |
| Cu-SAPO-34_ $\text{Na}_2\text{H}_2\text{EDTA}$ | 26.3 (31.8)                                                    | 21.0 (68.3) |
| Cu-SAPO-34_DEA                                 | 26.3 (33.6)                                                    | 20.6 (66.4) |
